# Supplementary material for: Antifungal Activity of the Phenolic Compounds Ellagic Acid (EA) and Caffeic Acid Phenethyl Ester (CAPE) against Drug-Resistant Candida auris
Source: MDPI journal article supplement (doi:10.3390/jof7090763), 2021-09-15
Supplement: s1 [file s1]

## Supplementary Materials

**Table S1.** *Candida* strains used in this study.

| Strain | Description  | Reference |
|--------|--------------|-----------|
| CAU-01 | AR-BANK#0381 | CDC       |
| CAU-02 | AR-BANK#0382 | CDC       |
| CAU-03 | AR-BANK#0383 | CDC       |
| CAU-04 | AR-BANK#0384 | CDC       |
| CAU-05 | AR-BANK#0385 | CDC       |
| CAU-06 | AR-BANK#0386 | CDC       |
| CAU-07 | AR-BANK#0387 | CDC       |
| CAU-08 | AR-BANK#0388 | CDC       |
| CAU-09 | AR-BANK#0389 | CDC       |
| CAU-10 | AR-BANK#0390 | CDC       |
| CAL    | WT           | ATCC      |
| CG     | WT           | ATCC      |
| CK     | WT           | ATCC      |
| CP     | WT           | ATCC      |
| CT     | WT           | ATCC      |

CAU: *Candida auris*; CAL: *Candida albicans*; CG: *Candida glabrata*; CK: *Candida krusei*; CP: *Candida parapsilosis*; CT: *Candida tropicalis*; WT: Wild-type/

**Table S2.** Antifungal susceptibility of antifungal agents against *Candida* spp.

| Strains | MIC values in µg/mL (interpretation) |           |          |
|---------|--------------------------------------|-----------|----------|
|         | Antifungals                          |           |          |
|         | AMB                                  | CPF       | FLC      |
| CAU-01  | 0.5 (S)                              | 0.125 (S) | 4 (S)    |
| CAU-02  | 0.5 (S)                              | 0.5 (S)   | 16 (S)   |
| CAU-03  | 0.5 (S)                              | 0.25 (S)  | 128 (R)  |
| CAU-04  | 0.5 (S)                              | 16 (R)    | 128 (R)  |
| CAU-05  | 0.5 (S)                              | 0.5 (S)   | >256 (R) |
| CAU-06  | 0.5 (S)                              | 0.5 (S)   | >256 (R) |
| CAU-07  | 1 (S)                                | 0.5 (S)   | 8 (S)    |
| CAU-08  | 1 (S)                                | 0.25 (S)  | >256 (R) |
| CAU-09  | 4 (R)                                | 0.5 (S)   | 256 (R)  |
| CAU-10  | 4 (R)                                | 0.5 (S)   | >256 (R) |
| CAL     | 0.5 (-)                              | 0.125 (S) | 0.25 (S) |
| CG      | 0.5 (-)                              | 0.25 (I)  | 8 (SDD)  |
| CK      | 0.5 (-)                              | 0.5 (I)   | 32 (-)   |
| CP      | 0.25 (-)                             | 0.5 (S)   | 1 (S)    |
| CT      | 0.25 (-)                             | 0.25 (S)  | 64 (R)   |

Classification based on CDC and CLSI guidelines. S: sensitive. I: intermediate R: resistant. SDD: susceptible dose dependent. Break-points for *C. albicans*: CPF ( $S \leq 0.25$ ;  $R > 0.5$ ) and FLC ( $S \leq 2$ ;  $R > 4$ ); *C. glabrata*: CPF ( $S \leq 0.125$ ;  $R > 0.25$ ) and FLC ( $S \leq 32$  SDD;  $R > 32$ ); *C. krusei*: CPF ( $S \leq 0.25$ ;  $R > 0.5$ ); *C. parapsilosis*: CPF and FLC ( $S \leq 2$ ;  $R > 4$ ); *C. tropicalis*: CPF ( $S \leq 0.25$ ;  $R > 0.5$ ) and FLC ( $S \leq 2$ ;  $R > 4$ ); *C. auris*: AMB and CPF ( $S < 2$ ;  $R \geq 2$ ), FLC ( $S < 32$ ;  $R \geq 32$ ).

AMB: amphotericin B, CPF: caspofungin, FLC: fluconazole.

**Table S3.** Anti-biofilm activities of EA, CAPE and FLC against *Candida* isolates.

| Strain                 | Agent | MBIC <sub>50</sub> (µg/mL) <sup>1</sup> determined by the |     | MBEC <sub>50</sub> (µg/mL) <sup>2</sup> determined by the |     |
|------------------------|-------|-----------------------------------------------------------|-----|-----------------------------------------------------------|-----|
|                        |       | use of                                                    |     | use of                                                    |     |
|                        |       | CV                                                        | XTT | CV                                                        | XTT |
| <i>C. auris</i> CAU-04 | EA    | >64                                                       | >64 | >64                                                       | >64 |
|                        | CAPE  | 64                                                        | 32  | >64                                                       | 32  |

|                           |             |     |     |     |     |
|---------------------------|-------------|-----|-----|-----|-----|
| <i>C. albicans</i> SC5314 | Fluconazole | >64 | >64 | >64 | >64 |
|                           | EA          | >64 | >64 | >64 | >64 |
|                           | CAPE        | 32  | 8   | >64 | 64  |
|                           | Fluconazole | ≤2  | ≤2  | >64 | >64 |

<sup>1</sup> MBIC<sub>50</sub>: lowest concentration of the test compound that resulted in >50% inhibition of biofilm formation compared to the control,

<sup>2</sup> MBEC<sub>50</sub>: The lowest concentration of the test compound resulted in >50% eradication of mature biofilm compared to the control.

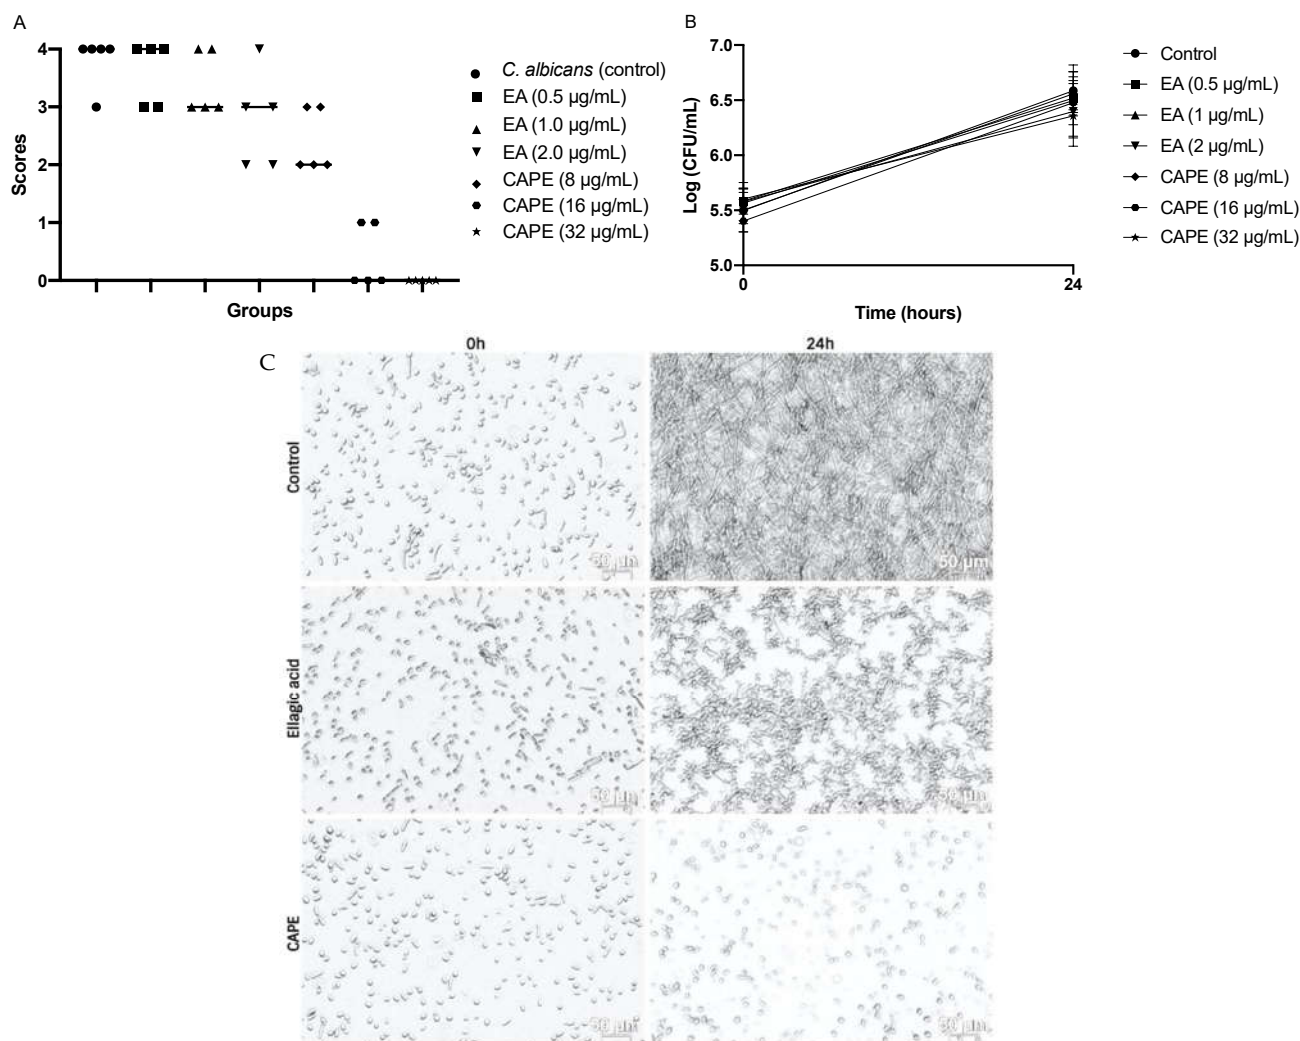

**Figure S1.** *C. albicans* filamentation assay. (A) Effects of EA and CAPE on *C. albicans* hyphal growth on liquid media. *C. albicans* was grown in RPMI-1640 medium in the presence of different concentrations of either EA or CAPE at 37°C for 24h. Median scores were obtained by hyphae counting of *C. albicans* alone (control group) and treatments (EA or CAPE). (B) Quantification of the CFU/mL (log) of *C. albicans* obtained in the non-treated control and experimental groups. No statistically significant differences were found. (C) Inhibitory effects of EA (4× MIC: 2 µg/mL) and CAPE (2× MIC: 16 µg/mL) on *C. albicans* filamentation. Aliquots were withdrawn and photographed using a bright field microscope.

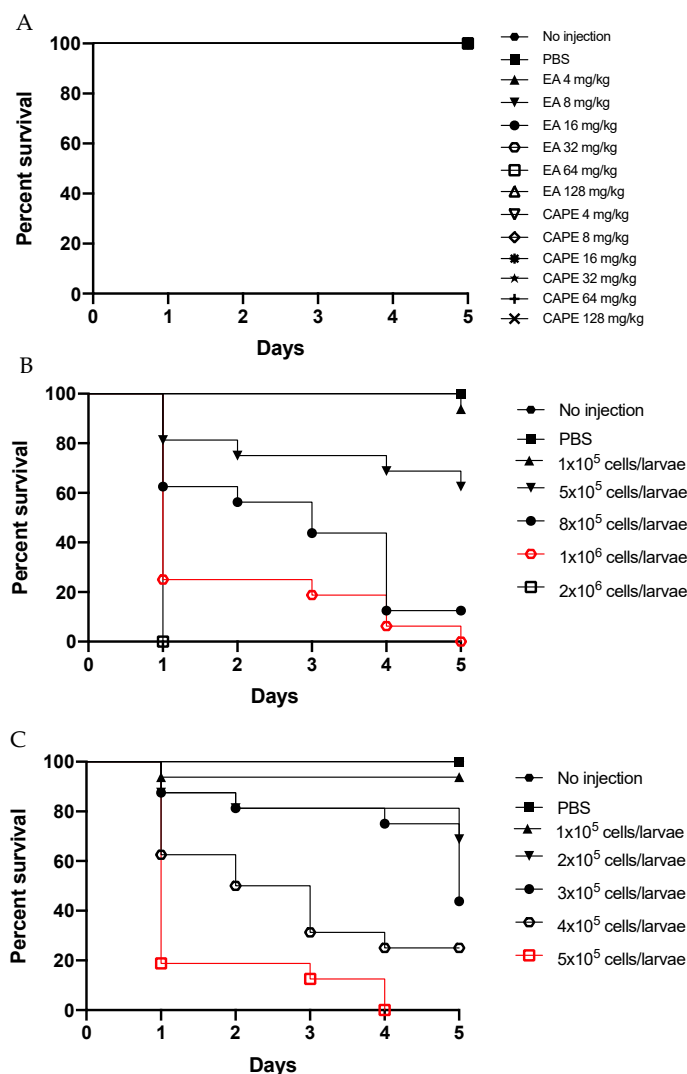

**Figure S2.** Toxicity of EA and CAPE and survival profile of *G. mellonella* when infected with *C. auris* and *C. albicans*. (A) Toxicity evaluation of EA and CAPE in *G. mellonella* model. No death was observed at the concentrations used. (B) Survival of *G. mellonella* larvae infected with different concentrations of *C. auris*. (C) Survival of *G. mellonella* larvae infected with different concentrations of *C. albicans*. The inoculum selected for further experiments are presented in red.

## References

- Alonso, G.C.; Pavarina, A.C.; Sousa, T. v.; Klein, M.I. A quest to find good primers for gene expression analysis of *Candida albicans* from clinical samples. *Journal of Microbiological Methods* **2018**, *147*, doi:10.1016/j.mimet.2018.02.010.
- Clinical & Laboratory Standards Institute (CLSI) M27-A2: *Reference Method for Broth Dilution Antifungal Susceptibility Testing of Yeasts; Approved Standard - Second Edition*. 1-51. 2002; National Committee for Clinical Laboratory Standards, 2002; ISBN 1562384694.
- Green, C.B.; Zhao, X.; Yeater, K.M.; Hoyer, L.L. Construction and Real-Time RT-PCR validation of *Candida albicans* PALS-GFP reporter strains and their use in flow cytometry analysis of *als* gene expression in budding and filamenting cells. *Microbiology* **2005**, *151*, doi:10.1099/mic.0.27696-0.
- Li, D.-D.; Deng, L.; Hu, G.-H.; Zhao, L.-X.; Hu, D.-D.; Jiang, Y.-Y.; Wang, Y. Using *Galleria mellonella*–*Candida albicans* infection model to evaluate antifungal agents. *Biological and Pharmaceutical Bulletin* **2013**, *36*, doi:10.1248/bpb.b13-00270.

5. Liang, R.; Cao, Y.; Zhou, Y.; Xu, Y.; Gao, P.; Dai, B.; Yang, F.; Tang, H.; Jiang, Y. Transcriptional response of *Candida albicans* biofilms following exposure to 2-amino-nonyl-6-methoxyl-tetralin muriate. *Acta Pharmacologica Sinica* **2010**, *31*, doi:10.1038/aps.2010.33.
6. Nailis, H.; Kucharíková, S.; Řiřicová, M.; van Dijck, P.; Deforce, D.; Nelis, H.; Coenye, T. Real-Time PCR expression profiling of genes encoding potential virulence factors in *Candida albicans* biofilms: identification of model-dependent and -independent gene expression. *BMC Microbiology* **2010**, *10*, doi:10.1186/1471-2180-10-114.
7. Rossoni, R.D.; Fuchs, B.B.; de Barros, P.P.; Velloso, M. dos S.; Jorge, A.O.C.; Junqueira, J.C.; Mylonakis, E. *Lactobacillus paracasei* modulates the immune system of *Galleria mellonella* and protects against *Candida albicans* infection. *PLOS ONE* **2017**, *12*, doi:10.1371/journal.pone.0173332.
